# Supplementary material for: Survey of Candidatus Liberibacter Solanacearum and Its Associated Vectors in Potato Crop in Spain
Source: MDPI journal article supplement (doi:10.3390/insects13100964), 2022-10-21
Supplement: s1 [file s1]

Table S1. Symptomatic and positive plants for CaLsol; mean and number of males and females and percentage of CaLsol+ specimens of *Bactericera* species captured by sweep net on occasional surveys in potato fields in different production areas in 2016, 2017 and 2018.

| Locality                          | Province   | Region           | Date       | Symptomatic plants | CaLsol+ | <i>B. nigricornis</i> |       |     |         |     |         | <i>B. trignonica</i> |       |   |         |    |         | <i>B. tremblayi</i> |       |   |         |   |         |
|-----------------------------------|------------|------------------|------------|--------------------|---------|-----------------------|-------|-----|---------|-----|---------|----------------------|-------|---|---------|----|---------|---------------------|-------|---|---------|---|---------|
|                                   |            |                  |            |                    |         | insects/sweep         |       | ♂   |         | ♀   |         | insects/sweep        |       | ♂ |         | ♀  |         | insects/sweep       |       | ♂ |         | ♀ |         |
|                                   |            |                  |            |                    |         | mean                  | dv st | N   | CaLsol+ | N   | CaLsol+ | mean                 | dv st | N | CaLsol+ | N  | CaLsol+ | mean                | dv st | N | CaLsol+ | N | CaLsol+ |
| <i>Cogeces de Íscar</i>           | Valladolid | Castile and Leon | 28/06/2016 | 13                 | 0       | 0.19                  | 0.19  | 9   | 0       | 10  | 0       | 0.00                 | 0.00  | 0 | -       | 0  | -       | 0.00                | 0.00  | 0 | -       | 0 | -       |
| <i>Íscar</i>                      | Valladolid | Castile and Leon | 28/06/2016 | 10                 | 0       | 0.31                  | 0.44  | 0   | -       | 14  | 0       | 0.00                 | 0.00  | 0 | -       | 0  | -       | 0.00                | 0.00  | 0 | -       | 0 | -       |
| <i>Pedrajas de San Esteban</i>    | Valladolid | Castile and Leon | 28/06/2016 | 17                 | 0       | 0.04                  | 0.13  | 0   | -       | 4   | 0       | 0.00                 | 0.00  | 0 | -       | 0  | -       | 0.00                | 0.00  | 0 | -       | 0 | -       |
| <i>Escalona del Prado</i>         | Segovia    | Castile and Leon | 30/06/2016 | 19                 | 0       | 0.00                  | 0.00  | 0   | -       | 0   | -       | 0.00                 | 0.00  | 0 | -       | 0  | -       | 0.00                | 0.00  | 0 | -       | 0 | -       |
| <i>Mozoncillo</i>                 | Segovia    | Castile and Leon | 30/06/2016 | 7                  | 0       | 0.34                  | 0.22  | 18  | 6       | 16  | 0       | 0.01                 | 0.03  | 1 | 0       | 0  | -       | 0.00                | 0.00  | 0 | -       | 0 | -       |
| <i>Torregutiérrez</i>             | Segovia    | Castile and Leon | 30/06/2016 | 10                 | 0       | 0.47                  | 0.18  | 14  | 0       | 33  | 0       | 0.00                 | 0.00  | 0 | -       | 0  | -       | 0.00                | 0.00  | 0 | -       | 0 | -       |
| <i>Cabizuela</i>                  | Ávila      | Castile and Leon | 07/07/2016 | 7                  | 0       | 0.00                  | 0.00  | 0   | -       | 0   | -       | 0.00                 | 0.00  | 0 | -       | 0  | -       | 0.00                | 0.00  | 0 | -       | 0 | -       |
| <i>Nava de Arévalo</i>            | Ávila      | Castile and Leon | 07/07/2016 | 13                 | 0       | 0.02                  | 0.04  | 2   | 0       | 0   | -       | 0.00                 | 0.00  | 0 | -       | 0  | -       | 0.00                | 0.00  | 0 | -       | 0 | -       |
| <i>Vinaderos</i>                  | Ávila      | Castile and Leon | 07/07/2016 | 11                 | 0       | 0.04                  | 0.07  | 0   | -       | 4   | 2       | 0.00                 | 0.00  | 0 | -       | 0  | -       | 0.00                | 0.00  | 0 | -       | 0 | -       |
| <i>Quintanilla del Agua</i>       | Burgos     | Castile and Leon | 21/07/2016 | 19                 | 0       | 0.01                  | 0.03  | 0   | -       | 1   | 0       | 0.00                 | 0.00  | 0 | -       | 0  | -       | 0.00                | 0.00  | 0 | -       | 0 | -       |
| <i>Tordomar</i>                   | Burgos     | Castile and Leon | 21/07/2016 | 0                  | 0       | 0.04                  | 0.07  | 0   | -       | 4   | 0       | 0.00                 | 0.00  | 0 | -       | 0  | -       | 0.00                | 0.00  | 0 | -       | 0 | -       |
| <i>Cantalpino</i>                 | Salamanca  | Castile and Leon | 28/07/2016 | 19                 | 0       | 0.02                  | 0.06  | 0   | -       | 2   | 0       | 0.00                 | 0.00  | 0 | -       | 0  | -       | 0.00                | 0.00  | 0 | -       | 0 | -       |
| <i>Pedrosillo de los Aires</i>    | Salamanca  | Castile and Leon | 28/07/2016 | 17                 | 0       | 0.07                  | 0.13  | 3   | 0       | 4   | 0       | 0.00                 | 0.00  | 0 | -       | 0  | -       | 0.00                | 0.00  | 0 | -       | 0 | -       |
| <i>Cabezón de Pisuerga</i>        | Valladolid | Castile and Leon | 09/08/2016 | 3                  | 0       | 0.01                  | 0.03  | 0   | 0       | 1   | 0       | 0.00                 | 0.00  | 0 | -       | 0  | -       | 0.00                | 0.00  | 0 | -       | 0 | -       |
| <i>Lomoviejo</i>                  | Valladolid | Castile and Leon | 09/08/2016 | 0                  | 1       | 0.05                  | 0.16  | 2   | -       | 3   | -       | 0.00                 | 0.00  | 0 | -       | 0  | -       | 0.00                | 0.00  | 0 | -       | 0 | -       |
| <i>Velascálvaro</i>               | Valladolid | Castile and Leon | 09/08/2016 | 4                  | 0       | 0.10                  | 0.32  | 3   | 0       | 7   | 0       | 0.00                 | 0.00  | 0 | -       | 0  | -       | 0.00                | 0.00  | 0 | -       | 0 | -       |
| <i>Chatún</i>                     | Segovia    | Castile and Leon | 01/08/2017 | 0                  | 0       | 0.04                  | 0.05  | 3   | 0       | 2   | 0       | 0.02                 | 0.04  | 1 | 0       | 1  | 1       | 0.04                | 0.07  | 0 | -       | 2 | 0       |
| <i>Cogeces de Íscar</i>           | Segovia    | Castile and Leon | 01/08/2017 | 0                  | 0       | 0.22                  | 0.20  | 10  | 0       | 12  | 0       | 0.03                 | 0.05  | 0 | -       | 3  | 1       | 0.00                | 0.00  | 0 | -       | 0 | -       |
| <i>Remondo</i>                    | Segovia    | Castile and Leon | 01/08/2017 | 6                  | 6       | 0.05                  | 0.05  | 1   | 0       | 4   | 0       | 0.00                 | 0.00  | 0 | -       | 0  | -       | 0.02                | 0.04  | 0 | -       | 1 | 0       |
| <i>Castresana de Losa</i>         | Burgos     | Castile and Leon | 03/08/2017 | 0                  | 0       | 0.00                  | 0.00  | 0   | -       | 0   | -       | 0.00                 | 0.00  | 0 | -       | 0  | -       | 0.00                | 0.00  | 0 | -       | 0 | -       |
| <i>Dobro</i>                      | Burgos     | Castile and Leon | 03/08/2017 | 0                  | 0       | 0.00                  | 0.00  | 0   | -       | 0   | -       | 0.00                 | 0.00  | 0 | -       | 0  | -       | 0.00                | 0.00  | 0 | -       | 0 | -       |
| <i>Fuenteurbel</i>                | Burgos     | Castile and Leon | 03/08/2017 | 0                  | 0       | 0.07                  | 0.08  | 0   | -       | 7   | 1       | 0.00                 | 0.00  | 0 | -       | 0  | -       | 0.00                | 0.00  | 0 | -       | 0 | -       |
| <i>Cubillo de Ebro</i>            | Santander  | Cantabria        | 17/08/2017 | 0                  | 0       | 0.00                  | 0.00  | 0   | -       | 0   | -       | 0.00                 | 0.00  | 0 | -       | 0  | -       | 0.00                | 0.00  | 0 | -       | 0 | -       |
| <i>Montecillo</i>                 | Santander  | Cantabria        | 17/08/2017 | 0                  | 0       | 0.22                  | 0.18  | 3   | 0       | 19  | 0       | 0.00                 | 0.00  | 0 | -       | 0  | -       | 0.00                | 0.00  | 0 | -       | 0 | -       |
| <i>Renado de Bricia</i>           | Santander  | Cantabria        | 17/08/2017 | 0                  | 0       | 0.02                  | 0.06  | 1   | 0       | 1   | 0       | 0.00                 | 0.00  | 0 | -       | 0  | -       | 0.00                | 0.00  | 0 | -       | 0 | -       |
| <i>San Martín de Elines</i>       | Santander  | Cantabria        | 17/08/2017 | 0                  | 0       | 0.00                  | 0.00  | 0   | -       | 0   | -       | 0.00                 | 0.00  | 0 | -       | 0  | -       | 0.00                | 0.00  | 0 | -       | 0 | -       |
| <i>Villamoñico</i>                | Santander  | Cantabria        | 17/08/2017 | 0                  | 0       | 0.00                  | 0.00  | 0   | -       | 0   | -       | 0.00                 | 0.00  | 0 | -       | 0  | -       | 0.00                | 0.00  | 0 | -       | 0 | -       |
| <i>Fuencaliente de Valdelucio</i> | Burgos     | Castile and Leon | 17/08/2017 | 0                  | 0       | 0.19                  | 0.19  | 4   | 0       | 15  | 1       | 0.00                 | 0.00  | 0 | -       | 0  | -       | 0.00                | 0.00  | 0 | -       | 0 | -       |
| <i>Becerril de Carpio</i>         | Palencia   | Castile and Leon | 17/08/2017 | 0                  | 0       | 0.04                  | 0.07  | 3   | 1       | 1   | 0       | 0.00                 | 0.00  | 0 | -       | 0  | -       | 0.00                | 0.00  | 0 | -       | 0 | -       |
| <i>Santa Mª de Mave</i>           | Palencia   | Castile and Leon | 17/08/2017 | 0                  | 0       | 0.27                  | 0.25  | 11  | 0       | 16  | 0       | 0.00                 | 0.00  | 0 | -       | 0  | -       | 0.00                | 0.00  | 0 | -       | 0 | -       |
| <i>Villallano</i>                 | Palencia   | Castile and Leon | 17/08/2017 | 0                  | 0       | 0.47                  | 0.13  | 18  | 0       | 29  | 0       | 0.00                 | 0.00  | 0 | -       | 0  | -       | 0.00                | 0.00  | 0 | -       | 0 | -       |
| <i>Chañe</i>                      | Segovia    | Castile and Leon | 12/07/2018 | 0                  | 0       | 0.16                  | 0.16  | 4   | 0       | 12  | 0       | 0.00                 | 0.00  | 0 | -       | 0  | -       | 0.00                | 0.00  | 0 | -       | 0 | -       |
| <i>Remondo</i>                    | Segovia    | Castile and Leon | 12/07/2018 | 0                  | 0       | 0.27                  | 0.25  | 6   | 0       | 21  | 0       | 0.00                 | 0.00  | 0 | -       | 0  | -       | 0.00                | 0.00  | 0 | -       | 0 | -       |
| <i>Cogeces de Íscar</i>           | Valladolid | Castile and Leon | 12/07/2018 | 0                  | 0       | 0.03                  | 0.05  | 0   | -       | 3   | 0       | 0.00                 | 0.00  | 0 | -       | 0  | -       | 0.02                | 0.04  | 0 | -       | 1 | 0       |
| <i>Cubillo</i>                    | Santander  | Cantabria        | 18/07/2018 | 0                  | 0       | 0.02                  | 0.06  | 0   | -       | 2   | -       | 0.00                 | 0.00  | 1 | -       | 1  | -       | 0.00                | 0.00  | 0 | -       | 0 | -       |
| <i>Campo de Cuéllar</i>           | Segovia    | Castile and Leon | 24/07/2018 | 0                  | 0       | 2.26                  | 0.73  | 66  | 1       | 160 | 0       | 0.00                 | 0.00  | 0 | -       | 0  | -       | 0.00                | 0.00  | 0 | -       | 0 | -       |
| <i>Ruerrero</i>                   | Santander  | Cantabria        | 30/07/2018 | 0                  | 0       | 0.10                  | 0.11  | 2   | -       | 8   | -       | 0.02                 | 0.04  | 1 | -       | 1  | -       | 0.00                | 0.00  | 0 | -       | 0 | -       |
| <i>Espinosa</i>                   | Santander  | Cantabria        | 07/08/2018 | 0                  | 0       | 0.08                  | 0.08  | 2   | -       | 6   | -       | 0.10                 | 0.28  | 0 | -       | 8  | -       | 0.00                | 0.00  | 0 | -       | 0 | -       |
| <i>Cubillo</i>                    | Santander  | Cantabria        | 21/08/2018 | 0                  | 0       | 0.04                  | 0.10  | 0   | -       | 4   | -       | 0.00                 | 0.00  | 0 | -       | 0  | -       | 0.00                | 0.00  | 0 | -       | 0 | -       |
| <i>Basconcillos del Tozo</i>      | Burgos     | Castile and Leon | 21/08/2018 | 0                  | 0       | 0.07                  | 0.11  | 2   | 0       | 5   | 0       | 0.00                 | 0.00  | 0 | -       | 0  | -       | 0.00                | 0.00  | 0 | -       | 0 | -       |
| <i>Santa Mª Mave</i>              | Palencia   | Castile and Leon | 21/08/2018 | 0                  | 0       | 0.18                  | 0.28  | 5   | 0       | 13  | 0       | 0.00                 | 0.00  | 0 | -       | 0  | -       | 0.00                | 0.00  | 0 | -       | 0 | -       |
| <i>Villarén de Valdivia</i>       | Palencia   | Castile and Leon | 21/08/2018 | 0                  | 0       | 0.03                  | 0.07  | 2   | 0       | 1   | 0       | 0.00                 | 0.00  | 0 | -       | 0  | -       | 0.00                | 0.00  | 0 | -       | 0 | -       |
| <i>Ruerrero</i>                   | Santander  | Cantabria        | 06/09/2018 | 0                  | 0       | 0.00                  | 0.00  | 0   | -       | 0   | -       | 0.00                 | 0.00  | 0 | -       | 0  | -       | 0.00                | 0.00  | 0 | -       | 0 | -       |
| <i>Espinosa</i>                   | Santander  | Cantabria        | 13/09/2018 | -                  | -       | 0.01                  | 0.03  | 0   | -       | 1   | -       | 0.00                 | 0.00  | 0 | -       | 0  | -       | 0.00                | 0.00  | 0 | -       | 0 | -       |
| Total                             |            |                  |            |                    | 7       |                       |       | 194 | 8       | 445 | 4       |                      |       | 4 | 0       | 14 | 2       |                     |       | 0 | 0       | 4 | 0       |
