# Supplementary material for: Survey of Candidatus Liberibacter Solanacearum and Its Associated Vectors in Potato Crop in Spain
Source: MDPI journal article supplement (doi:10.3390/insects13100964), 2022-10-21
Supplement: s1 [file s1]

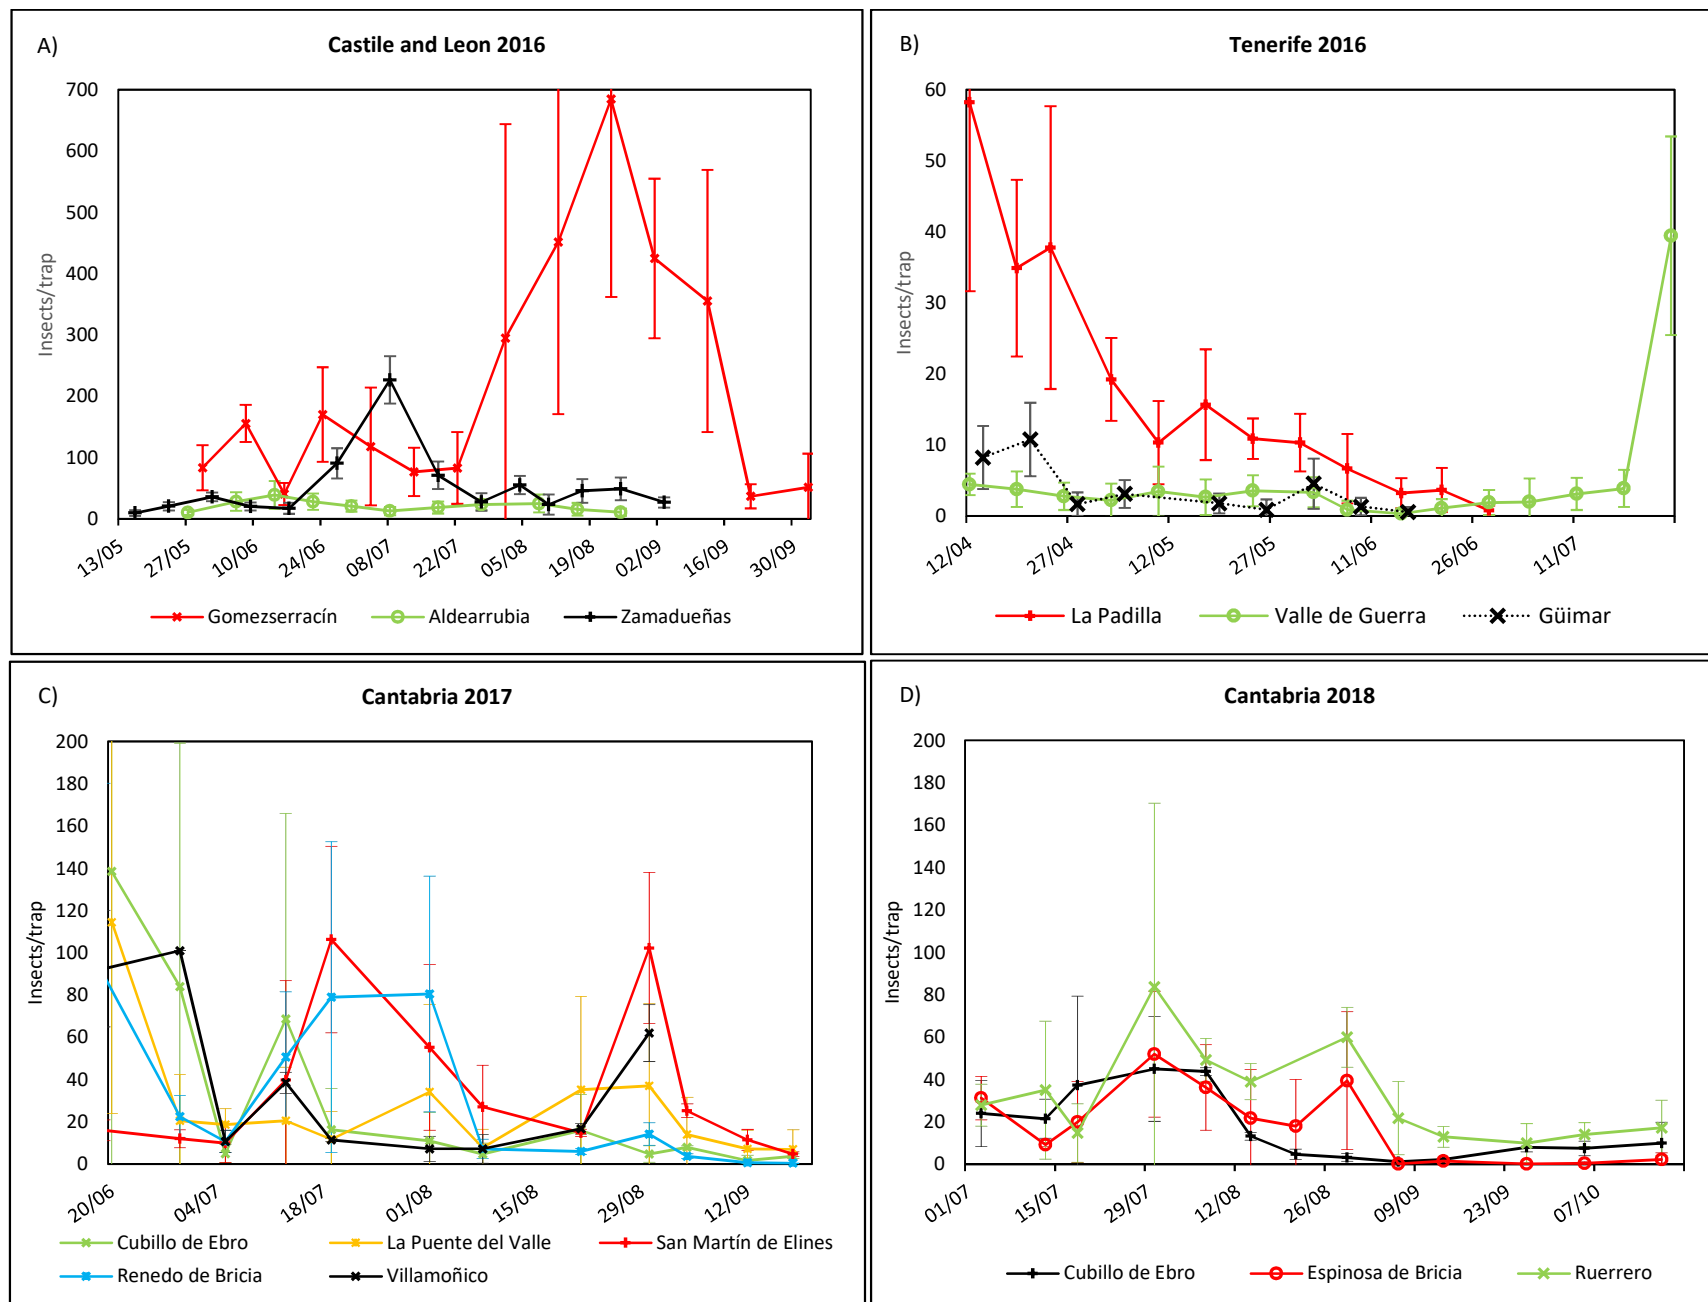

Figure S2. Mean of number of psyllids per yellow sticky trap in A) Castile and Leon in 2016; B) Tenerife (Canary Islands) in 2016; C) Cantabria in 2017; and D) Cantabria in 2018.
