# Supplementary material for: Survey of Candidatus Liberibacter Solanacearum and Its Associated Vectors in Potato Crop in Spain
Source: MDPI journal article supplement (doi:10.3390/insects13100964), 2022-10-21
Supplement: s1 [file s1]

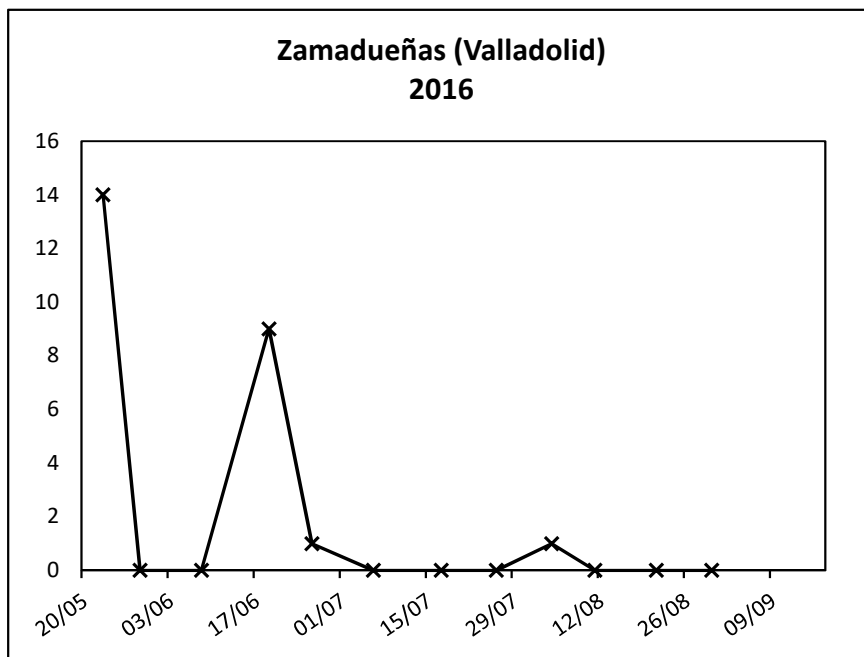

Figure S3. Mean of number of psyllids captures by Irwin traps in Zamadueñas (Valladolid, Castilla y León) in 2017.
