# Supplementary figures and images for: Survey of Candidatus Liberibacter Solanacearum and Its Associated Vectors in Potato Crop in Spain
Source: MDPI journal article supplement (doi:10.3390/insects13100964), 2022-10-21

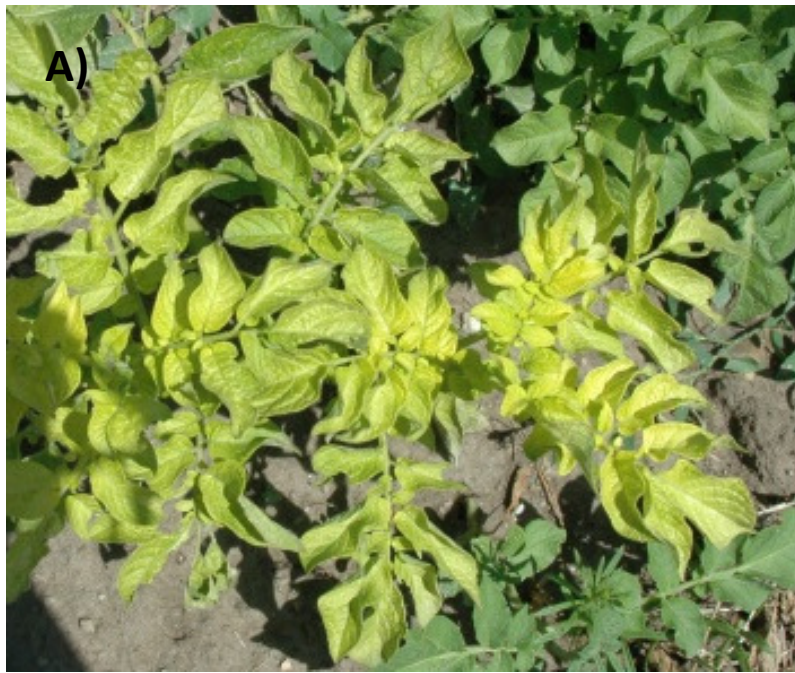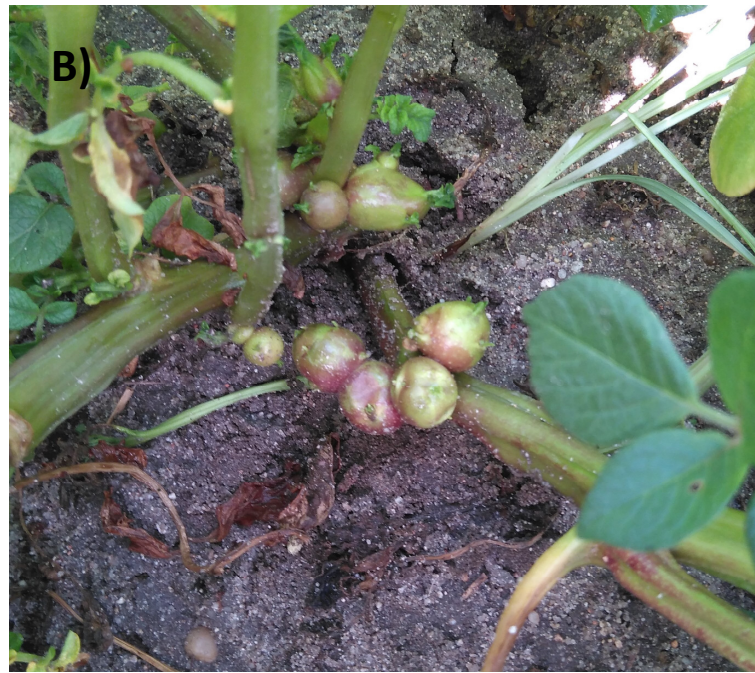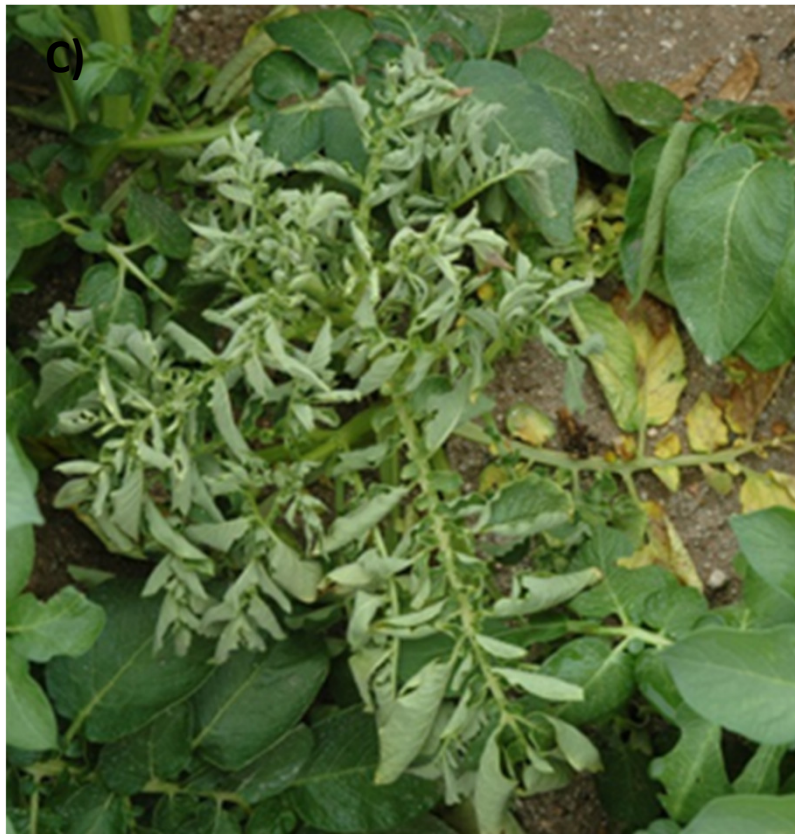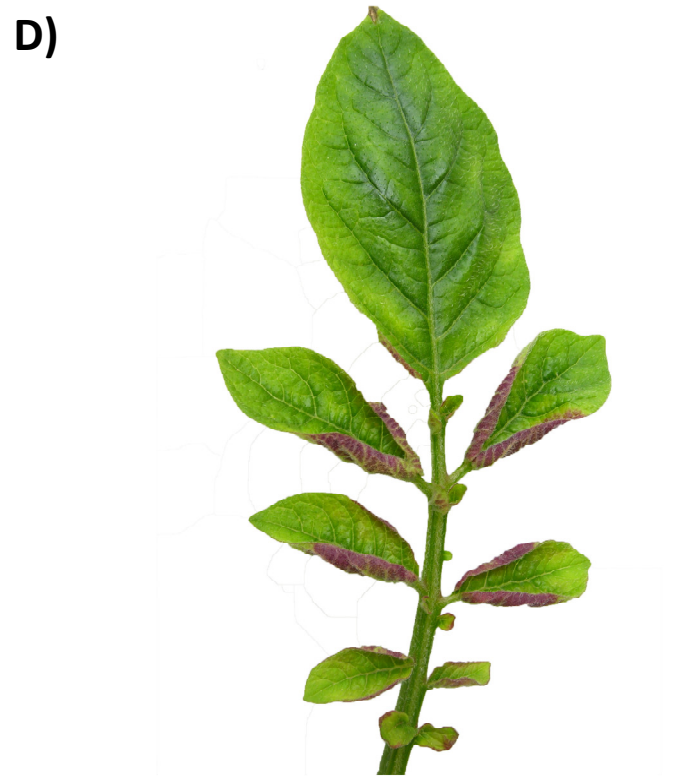

Figure S1. Symptoms found in potato plants in occasional surveys in Mainland Spain.

Supplement: s1 [file s1]
